# Supplementary material for: Life Science Professional Societies Expand Undergraduate Education Efforts
Source: Atypon-hosted journal article supplement (doi:10.1187/cbe.16-01-0019), 2017-01-27
Supplement: combinedsupmats.pdf [file combinedsupmats.pdf]

# Supplemental Material

*CBE—Life Sciences Education*

Matyas *et al.*

**Supplementary Materials for  
 “Professional Societies’ Undergraduate Education Efforts Increase  
 during the Vision and Change Era,”  
 Matyas, M.L., Ruedi, E. A., Engen, K. and Chang, A.L.**

**Table S1: Societies Addressing Undergraduate Education through  
 Leadership Activities 2008-2014**

| Leadership and Sustainability Activities                                                                                                                 | 2014 All Respondents (%) |
|----------------------------------------------------------------------------------------------------------------------------------------------------------|--------------------------|
| Society’s mission and strategic goals address undergraduate education explicitly                                                                         | 48                       |
| Undergraduate faculty are represented in society governance or committees                                                                                | 81                       |
| Community college faculty are represented in society governance or committees                                                                            | 33                       |
| Future faculty (e.g., graduate students and postdoctoral fellows involved in undergraduate teaching) are represented in society governance or committees | 44                       |
| Undergraduate students are represented in society governance or committees                                                                               | 22                       |

<sup>1</sup> Includes those societies who said they had internal and external support for undergraduate activities.

**Table S2: Volunteer Leadership and Society Staff Responsible for Education Initiatives**

| Volunteer Position                                                         | 2014 All Respondents (%) | Staff Position                                                          | 2014 All Respondents (%) |
|----------------------------------------------------------------------------|--------------------------|-------------------------------------------------------------------------|--------------------------|
| Committee Chair (with education, communication, and or diversity missions) | 86                       | Section Director (with education and/or communication responsibilities) | 36                       |
| Editorial Expert (Editor in chief or associate editor)                     | 17                       | Manager/Coordinator (not specifically education)                        | 36                       |
| Education Fellow                                                           | 11                       | Executive Director                                                      | 11                       |
| Executive Director (staff)*                                                | 3                        | Staff assistant to Executive Dir.                                       | 3                        |
|                                                                            |                          | Education Fellow                                                        | 3                        |
|                                                                            |                          | No paid staff/not applicable                                            | 22                       |

\* One society indicated that their executive director took responsibility for education initiatives on a volunteer basis.

**Table S3: Sources of Support for Education Programs 2008-2014**

| Support Source                                                                                                                                                                   | 2014 All Respondents (%) | Comparison Group (%) |                 |
|----------------------------------------------------------------------------------------------------------------------------------------------------------------------------------|--------------------------|----------------------|-----------------|
|                                                                                                                                                                                  |                          | 2008                 | 2014            |
| Revenue generated from other society programs and/or activities not included above (e.g., membership, registrations, subscriptions, fees and/or non-business related activities) | 82                       |                      |                 |
| External sources (e.g., grants, contracts, and/or foundations)                                                                                                                   | 57                       |                      |                 |
| Society's strategic reserves (e.g., endowments and/or reserved funds)                                                                                                            | 46                       | 7                    | 54 <sup>1</sup> |
| Revenue generated from society education programs and/or activities (e.g., registrations, subscriptions, and/or fees)                                                            | 43                       |                      |                 |

<sup>1</sup>p=0.0142

**Table S4: Societies' 2014 Annual Budgets for Education**

| Budget Ranges          | 2014 All Respondents (%) |
|------------------------|--------------------------|
| Less than \$25,000     | 19                       |
| \$26-50,000            | 7                        |
| \$51-100,000           | 15                       |
| \$101-250,000          | 15                       |
| \$251-500,000          | 19                       |
| Greater than \$500,000 | 11                       |
| Don't know             | 15                       |

**Table S5: Collaborations with Other Organizations 2008-2014**

| Collaborations                                                                                                                                       | 2014 All Respondents (%) |
|------------------------------------------------------------------------------------------------------------------------------------------------------|--------------------------|
| Formal education collaborations and coalitions with other societies                                                                                  | 76                       |
| Formal education collaborations and coalitions with other organizations (e.g., education centers, museums, community-based programs) and foundations | 48                       |
| Sponsored presentations with other societies (e.g., society sponsored sessions at the National Science Teacher Association)                          | 67                       |
| Sponsored memberships with other societies for undergraduate faculty                                                                                 | 24                       |
| Sponsored memberships with other societies for undergraduate students                                                                                | 5                        |
| Outreach to international community on undergraduate education initiatives                                                                           | 52                       |

**Table S6: Society Undergraduate Programs with Specific Goals and Measureable Objectives**

| Percentage of programs with specific goals and objectives | 2014 All Respondents (%) |
|-----------------------------------------------------------|--------------------------|
| None                                                      | 32                       |
| 1 to 24%                                                  | 18                       |
| 25 to 49%                                                 | 11                       |
| 50 to 74%                                                 | 11                       |
| 75 to 99%                                                 | 18                       |
| 100%                                                      | 7                        |
| Don't know                                                | 4                        |

**Table S7: Evaluation Designs Used for Society Undergraduate Programs 2008-2014**

| Design Approaches                                                                   | 2014 All Respondents (%) |
|-------------------------------------------------------------------------------------|--------------------------|
| Post assessment only (e.g., exit survey of participants)                            | 62                       |
| Time series assessment (e.g., pre-, post-, and/or follow-up survey of participants) | 34                       |
| Quasi-experimental design (includes participants and a comparison group)            | 7                        |
| Randomized study (participants randomly assigned to program or control group)       | -                        |
| Not applicable                                                                      | 17                       |
| Don't know                                                                          | 3                        |
| Other evaluations                                                                   | 7                        |

**Table S8: Evaluation Methods Used for Society Undergraduate Programs 2008-2014**

| Evaluation Methods                                                                      | 2014 All Respondents (%) |
|-----------------------------------------------------------------------------------------|--------------------------|
| Survey – multiple choice questions                                                      | 70                       |
| Survey – open-ended questions                                                           | 63                       |
| Records/Products (e.g., products developed, attendance rates, grades, completion rates) | 41                       |
| Interviews and/or focus groups                                                          | 41                       |
| External evaluation – Consultant                                                        | 30                       |
| Online discussions                                                                      | 26                       |
| Observations                                                                            | 26                       |
| External evaluation – Committee review                                                  | 19                       |
| Not applicable                                                                          | 19                       |
| Tests/quizzes                                                                           | 15                       |

|                                           |   |
|-------------------------------------------|---|
| I don't know                              | 7 |
| Other quantitative or qualitative methods | 4 |

**Table S9: Evaluation Dissemination Methods Used for Society Undergraduate Programs 2008-2014**

| Evaluation Dissemination Methods                                        | 2014 All Respondents (%) |
|-------------------------------------------------------------------------|--------------------------|
| Web distribution (e.g., society sponsored webpages, blogs)              | 56                       |
| Sessions at society's meetings, workshops, and other events             | 44                       |
| Non-scholarly publications (e.g., magazines, newsletters, reports)      | 37                       |
| Sessions at non-society sponsored meetings, workshops, and other events | 30                       |
| Social media (e.g., Facebook, Twitter, LinkedIn)                        | 30                       |
| Peer-reviewed scholarly publications (e.g., journals or reports)        | 11                       |
| Not applicable                                                          | 30                       |
| I don't know                                                            | 15                       |
| Other (please describe)                                                 | -                        |
